# Supplementary material
Source: Springer Nature journal article supplement (https://www.springermedizin.de/resource/supplementary/12879_2011_2071_MOESM6_ESM.pdf/9443634)

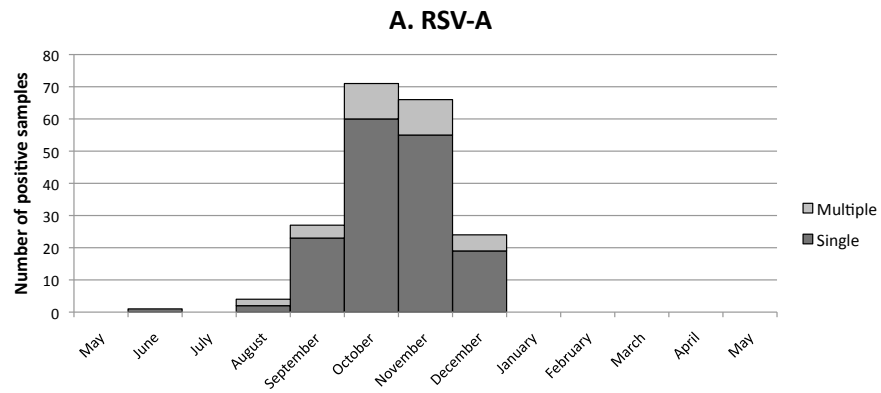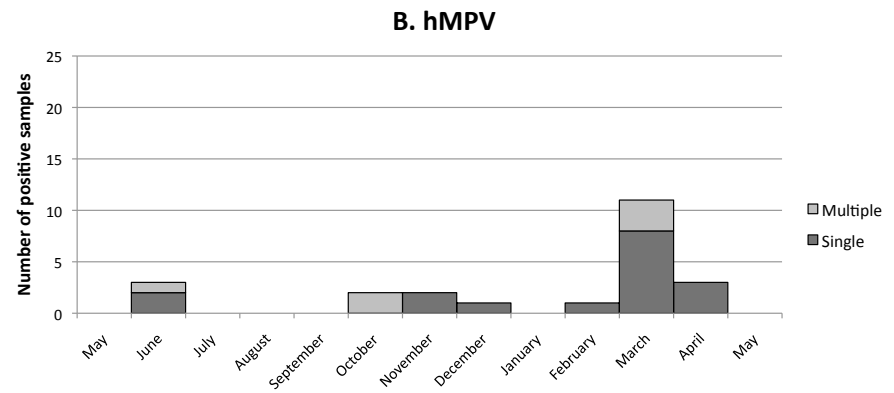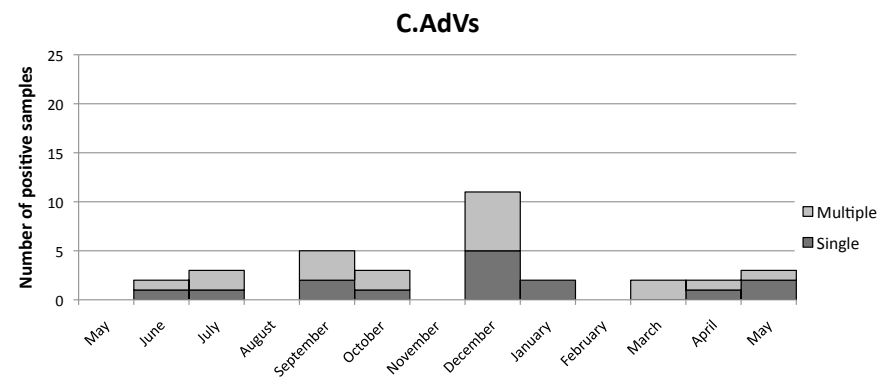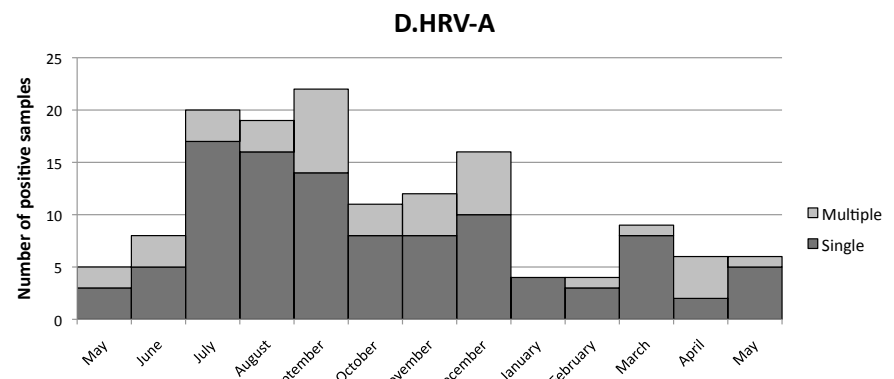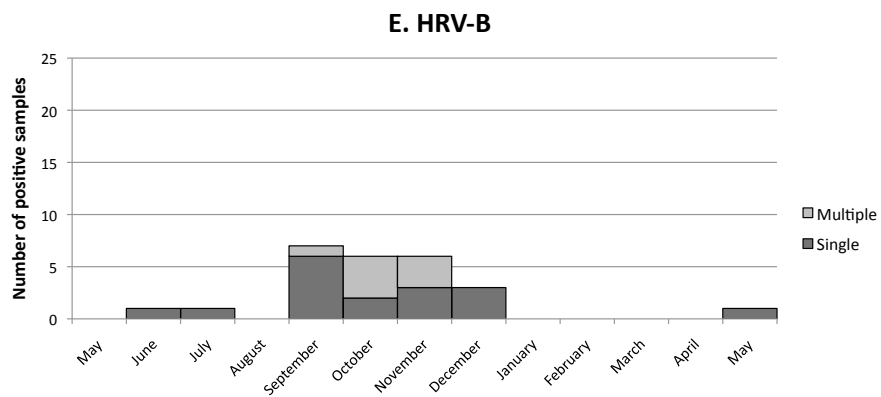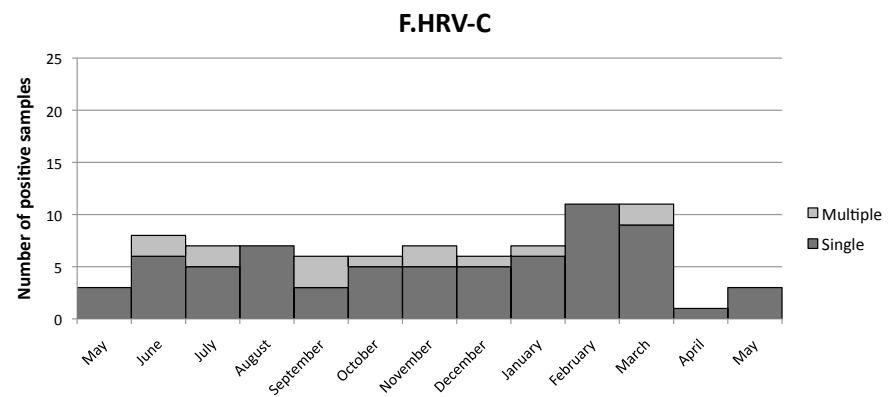

Figure4

Supplement: MOESM6 [file 9443634]
